# Supplementary material for: Superior energy storage performance realized in antiferroelectric 0.10 wt% MnO2–AgNbO3 ceramics via Bi-doping induced phase engineering
Source: Royal Society of Chemistry journal article supplement (doi:10.1039/d3ta04605b), 2023-01-01
Supplement: d3ta04605b1.pdf [file d3ta04605b1.pdf]

## Supporting Information

### Superior energy storage performance realized in antiferroelectric 0.10 wt% MnO<sub>2</sub>-AgNbO<sub>3</sub> ceramics via Bi-doping induced phase engineering

Jing Wang,<sup>‡a</sup> Xuhui Fan,<sup>‡ab</sup> Zhen Liu,<sup>‡c</sup> Kongjun Zhu,<sup>a</sup> Hao Yuan,<sup>ab</sup> Zehan Zheng,<sup>ab</sup> Lei Zhao,<sup>\*d</sup> Ji Zhang,<sup>\*c</sup> Qibin Yuan<sup>\*e</sup> and Jing-Feng Li<sup>\*f</sup>

<sup>a</sup>State Key Laboratory of Mechanics and Control for Aerospace Structures, College of Aerospace Engineering, Nanjing University of Aeronautics and Astronautics, Nanjing 210016, China

<sup>b</sup>School of Materials Science and Engineering, Nanjing University of Aeronautics and Astronautics, Nanjing 210016, China

<sup>c</sup>School of Materials Science and Engineering, Nanjing University of Science and Technology, Nanjing, 210094, China

<sup>d</sup>Key Laboratory of High-precision Computation and Application of Quantum Field Theory of Hebei Province, College Physics Science & Technology, Hebei University, Baoding 071002, China

<sup>e</sup>School of Electronic Information and Artificial Intelligence, Shaanxi University of Science and Technology, Xi'an, Shaanxi 710021, China

<sup>f</sup>State Key Laboratory of New Ceramics and Fine Processing, School of Materials Science and Engineering, Tsinghua University, Beijing, 100084, China

<sup>‡</sup>These authors contributed equally to this work.

\*Corresponding authors. E-mail addresses: leizhao@hbu.edu.cn (L. Zhao), jizhang@njust.edu.cn (J. Zhang), yuanqibin-sust@163.com (Q. B. Yuan), jingfeng@mail.tsinghua.edu.cn (J.-F. Li)

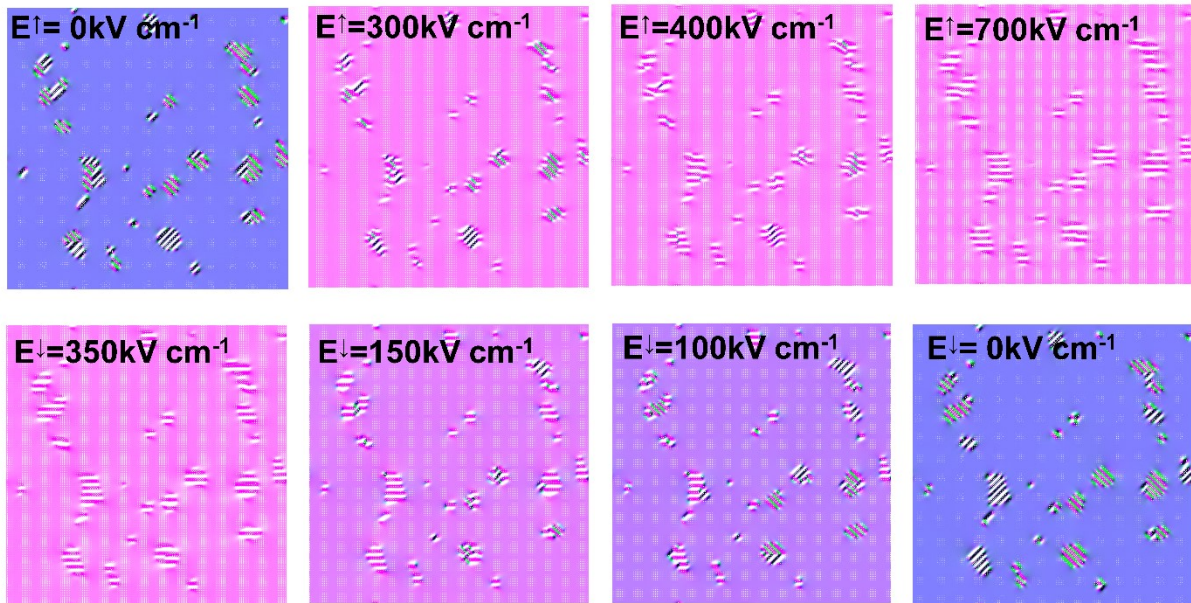

**Fig. S1** The polarization switching behavior of the doped AN sample with 94% PE phase.  $E\uparrow$  and  $E\downarrow$  represent the stages of increasing electric field and decreasing electric field, respectively.

Fig. S1 indicates the polarization switching behavior of the doped AN sample with 94% PE phase. Upon increasing the electric field, the lamellar AFE domains gradually switch to the  $[001]$  direction and the structure transforms to FE state at  $700 \text{ kV cm}^{-1}$ . The FE state is maintained until the electric field decreases to  $350 \text{ kV cm}^{-1}$ . After that, it transfers back to local AFE domains.

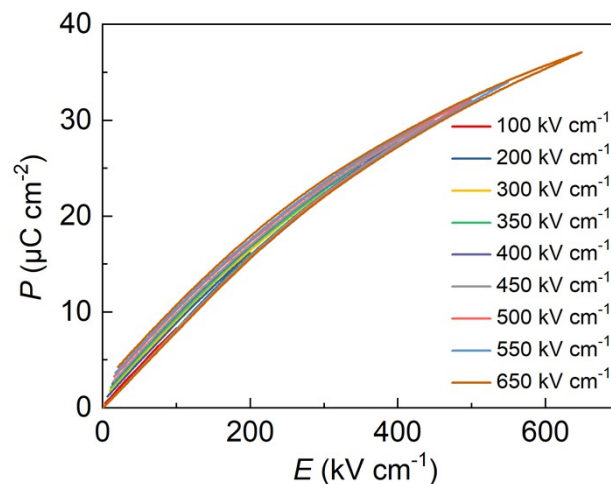

**Fig. S2** Room-temperature  $P$ - $E$  loops of AN-0.12Bi ceramic measured at various electric fields.

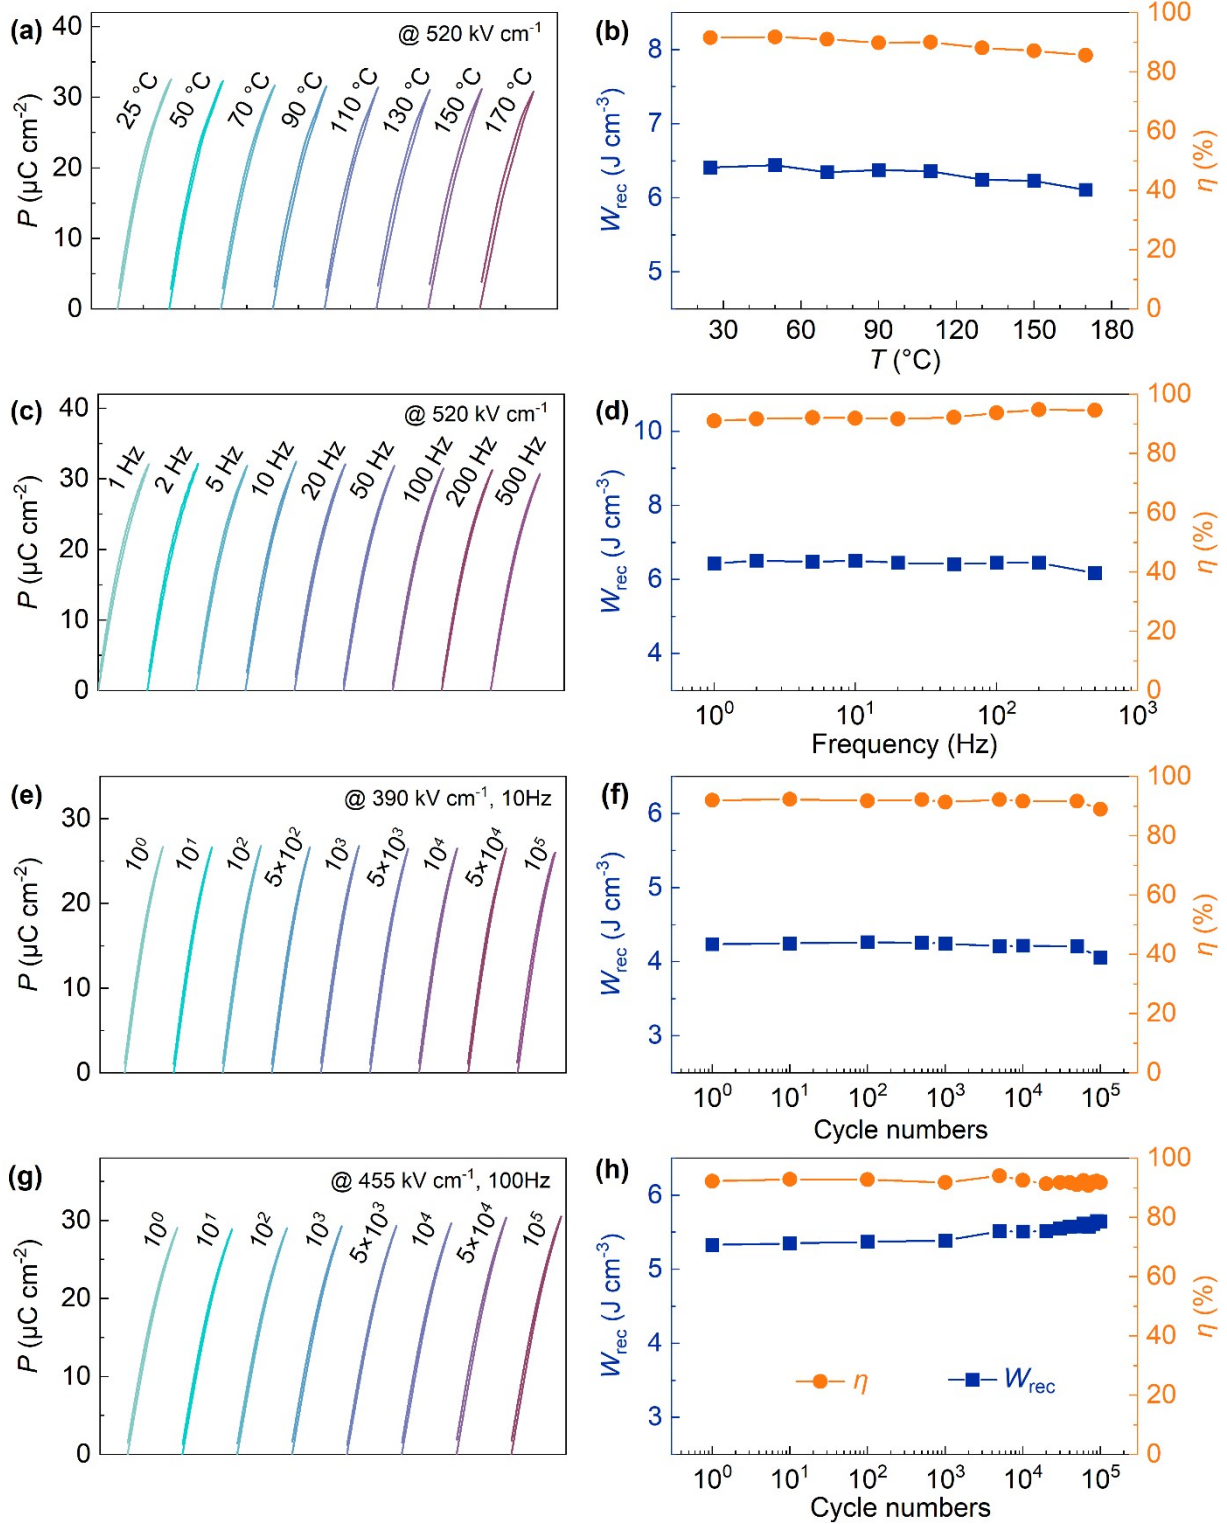

**Fig. S3** (a)-(b)Temperature, (c)-(d)frequency and (e)-(h) cycling stability of AN-0.12Bi ceramic with (a)(c)(e)(g)  $P$ - $E$  loops and (b)(d)(f)(h) corresponding  $W_{\text{rec}}$  and  $\eta$ .

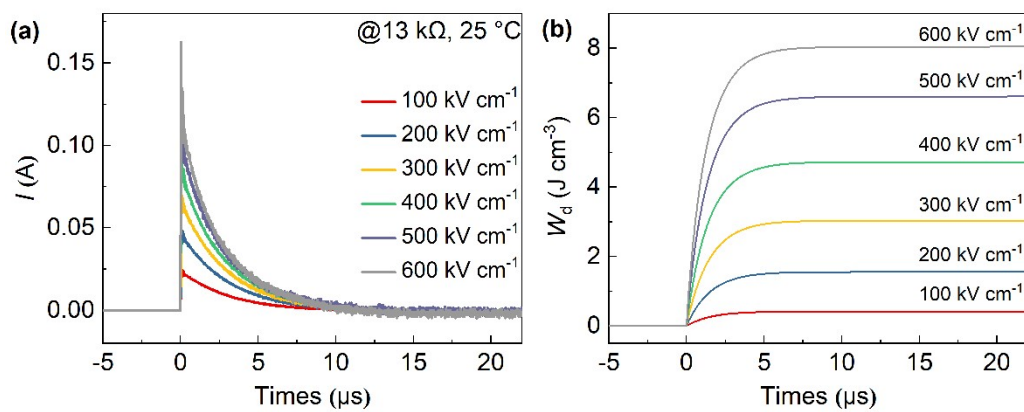

**Fig. S4** The discharge (a) current-time curves and (b)  $W_d$  under different electric fields of the AN-0.12Bi ceramic.

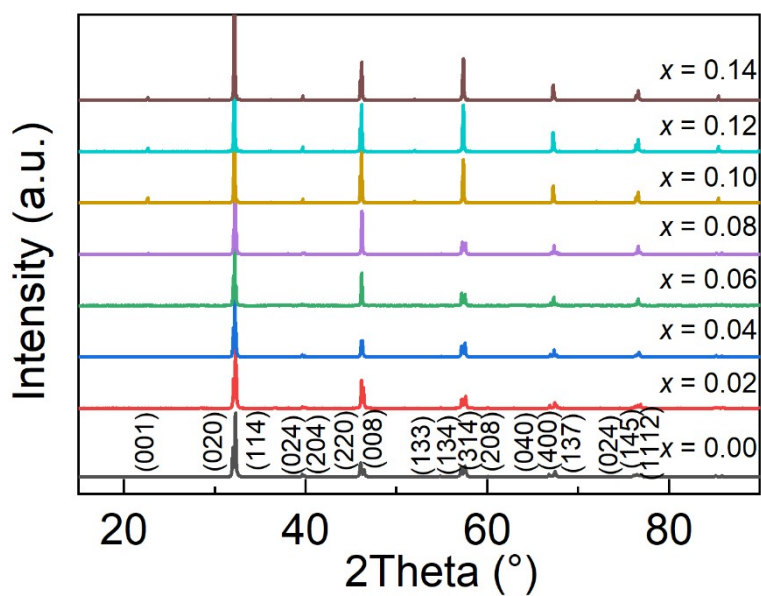

**Fig. S5** XRD patterns of AN- $x$ Bi ceramics at room temperature.

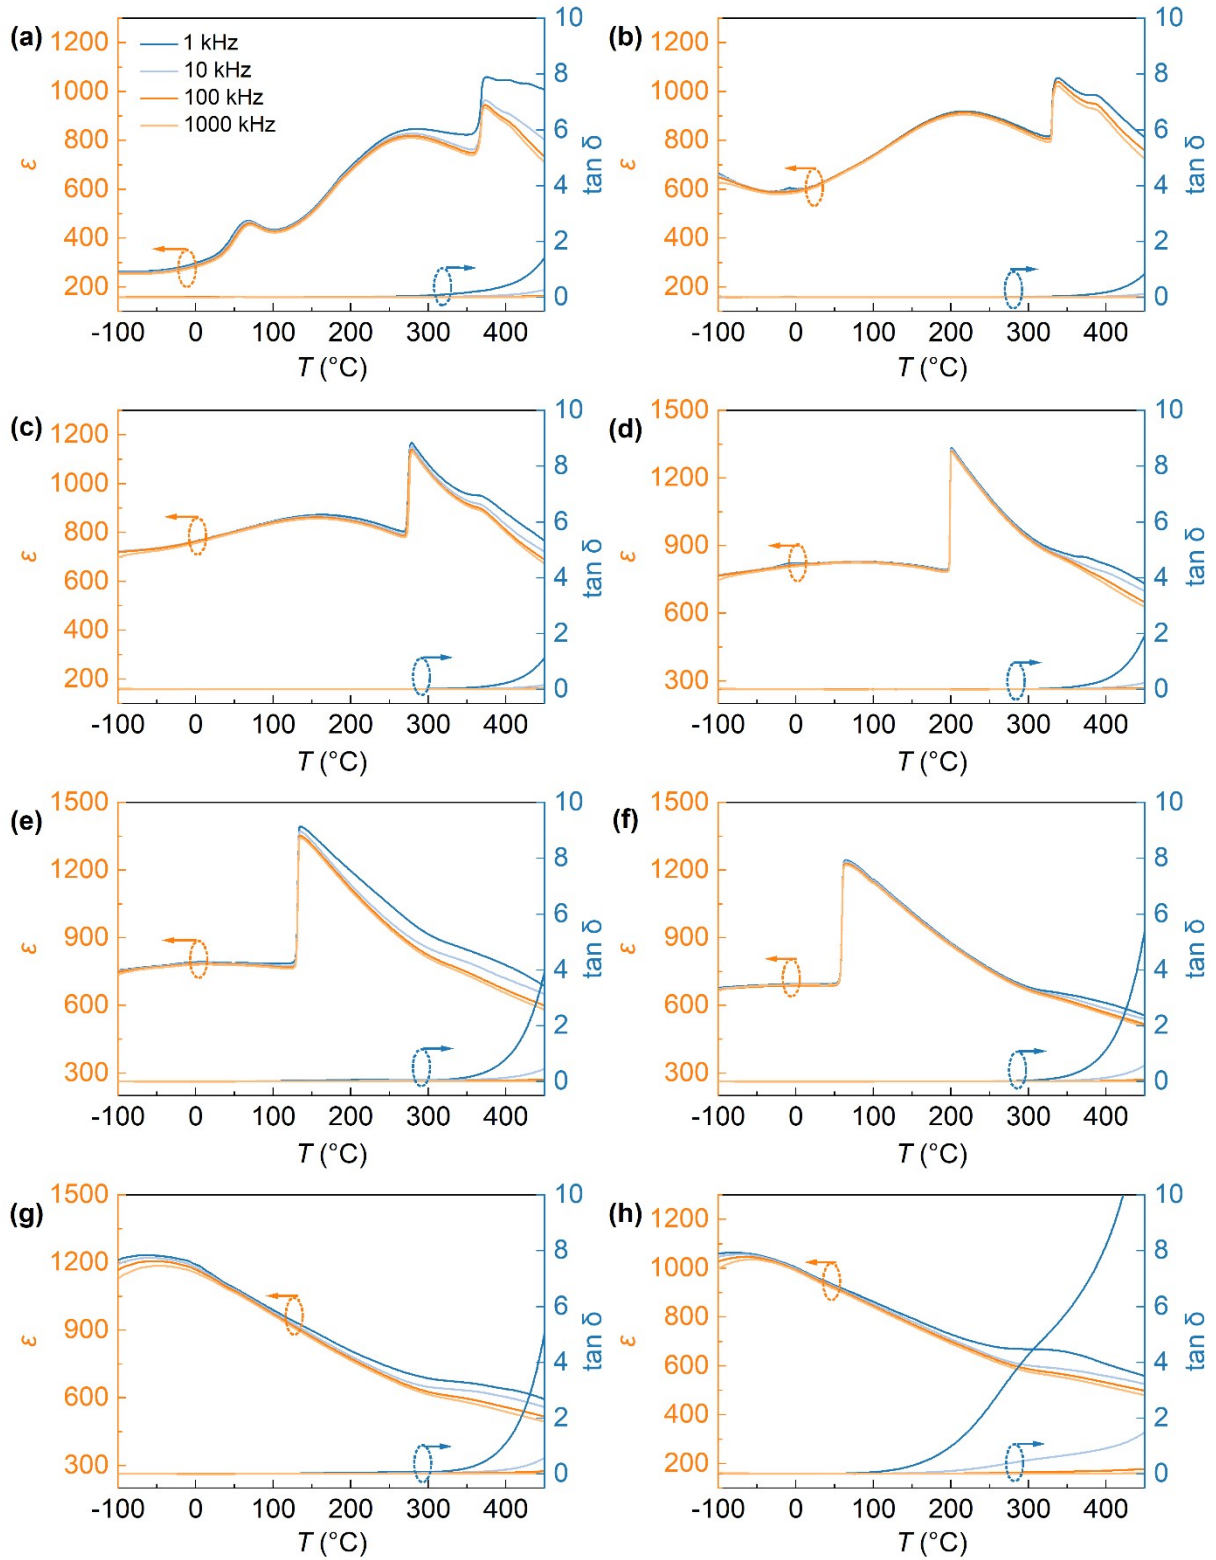

**Fig. S6** Temperature dependence of dielectric constant and dielectric loss measured at various frequencies during the heating process from -100 to 450 °C. (a) AN-0.00Bi; (b) AN-0.02Bi; (c) AN-0.04Bi; (d) AN-0.06Bi; (e) AN-0.08Bi; (f) AN-0.10Bi; (g) AN-0.12Bi and (h) AN-0.14Bi ceramics.

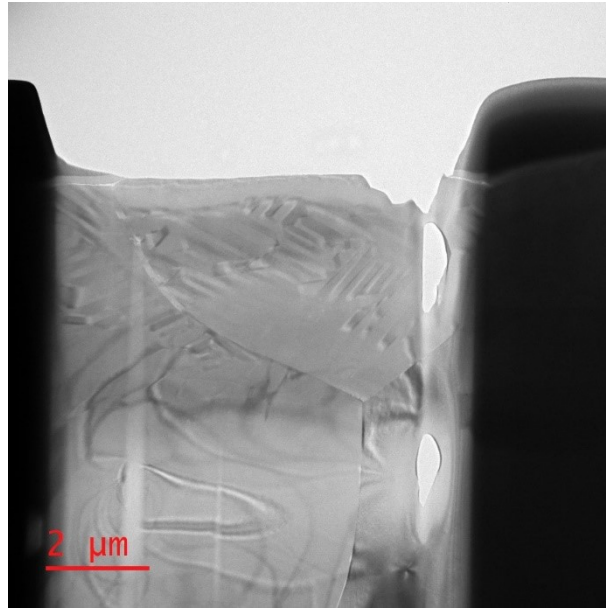

**Fig. S7** Overview bright-field TEM image of AN-0.12Bi ceramic.

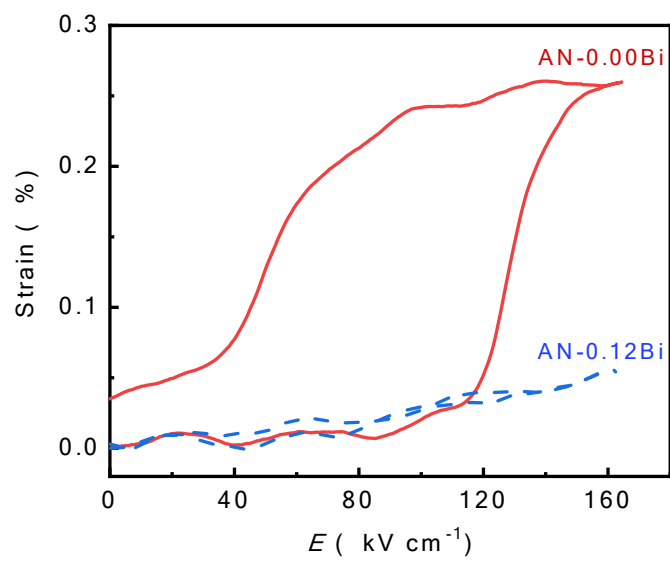

**Fig. S8** The electric-field-induced strain of AN-0.00Bi and AN-0.12Bi ceramics.

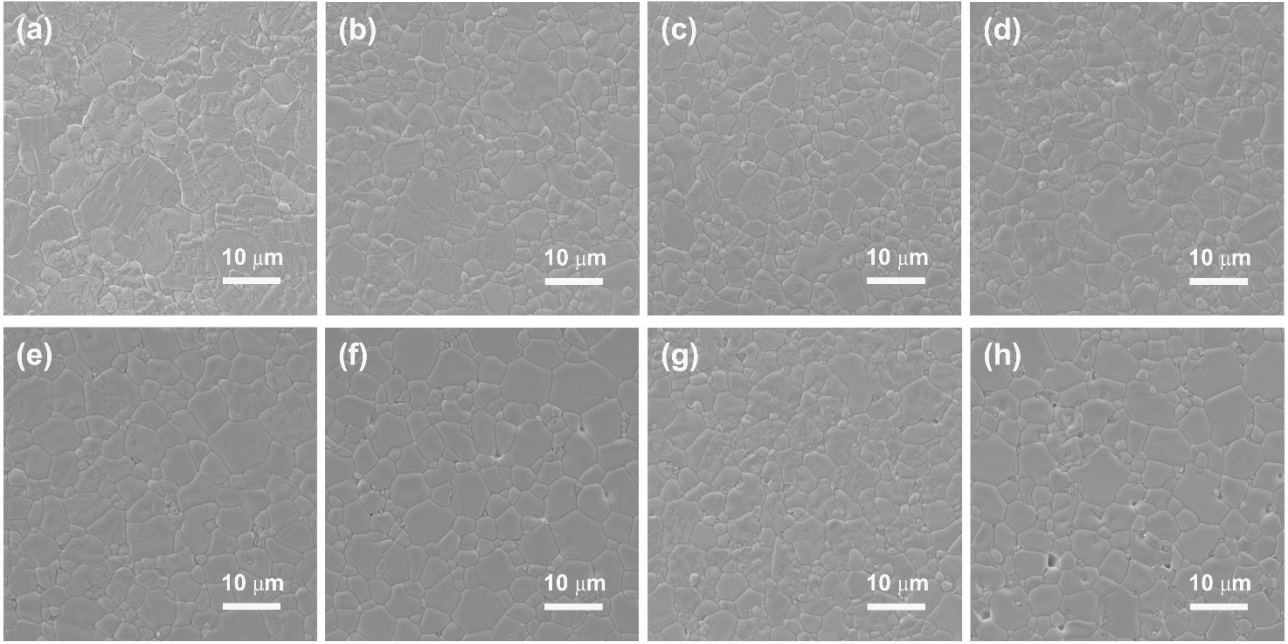

**Fig. S9** SEM images of AN- $x$ Bi ceramics: (a)  $x=0.00$ , (b)  $x=0.02$ , (c)  $x=0.04$ , (d)  $x=0.06$ , (e)  $x=0.08$ , (f)  $x=0.10$ , (g)  $x=0.12$  and (h)  $x=0.14$ .

The strain, which would cause electromechanical breakdown, may be also responsible for the sharply changed  $E_b$  in AN- $x$ Bi ceramics. As there is a quadratic relationship between strain and polarization, the strain jump occurs over very small electric field range and thus increases the risk of mechanical failure in dielectric materials with square-shaped  $P$ - $E$  loops, while the strain normally develops slowly over a wide external electric field range in the ones with slim-slanted hysteresis loops (J. Appl. Phys. 2016, 119, 024104). This should be evident in present work. Take two representative samples, revealing nearly square-shaped  $P$ - $E$  loops (i.e., AN-0.00Bi) and slim-slanted  $P$ - $E$  loops (i.e., AN-0.12Bi), for example. The electric-field-induced strain of AN-0.00Bi and AN-0.12Bi displayed giant difference at the same electric field of  $165 \text{ kV cm}^{-1}$  (Fig. S8). Though this trend does not fit the  $x=0.14$  sample, the decreased  $E_b$  here is attributed to a porous microstructure, as shown in Fig. S9.

**Table S1** The comparison on the energy storage properties between our present work and representative lead-based AFE ceramics

| Sample                                                                                                                                                 | Energy storage properties<br>obtained via <i>P-E</i> loops |            | Overdamped discharge<br>energy density      |                                             | Preparation<br>method | Reference               |                                       |
|--------------------------------------------------------------------------------------------------------------------------------------------------------|------------------------------------------------------------|------------|---------------------------------------------|---------------------------------------------|-----------------------|-------------------------|---------------------------------------|
|                                                                                                                                                        | $W_{\text{rec}}$ (J cm <sup>-3</sup> )                     | $\eta$ (%) | Electric<br>field<br>(kV cm <sup>-1</sup> ) | Electric<br>field<br>(kV cm <sup>-1</sup> ) |                       |                         |                                       |
| 0.10 wt% MnO <sub>2</sub> -<br>Ag <sub>0.64</sub> Bi <sub>0.12</sub> NbO <sub>3</sub><br>(AN-0.12Bi)                                                   | 9.0                                                        | 90         | 650                                         | 8.0                                         | 600                   | Solid-state<br>reaction | This work                             |
| 0.99(Pb <sub>0.97</sub> La <sub>0.02</sub> )<br>(Zr <sub>0.6</sub> Sn <sub>0.4</sub> )O <sub>3</sub> -0.01AgNbO <sub>3</sub>                           | 10.81                                                      | 85.05      | 400                                         | 8.72                                        | 360                   | Solid-state<br>reaction | J. Mater. Chem.<br>A 2021, 9, 11291   |
| Pb <sub>0.88</sub> La <sub>0.04</sub> Sr <sub>0.06</sub> ((Zr <sub>0.6</sub> Sn <sub>0.4</sub> ) <sub>0.8</sub><br>4Ti <sub>0.16</sub> )O <sub>3</sub> | 1.52                                                       | 93.3       | 129                                         | 1.21                                        | 129                   | Solid-state<br>reaction | Ceram. Int. 2016,<br>42, 12875        |
| (Pb <sub>0.915</sub> Ba <sub>0.04</sub> La <sub>0.03</sub> )(Zr <sub>0.65</sub> Sn <sub>0.3</sub><br>Ti <sub>0.05</sub> )O <sub>3</sub>                | 4.44                                                       | 88.8       | 170                                         | 4.22                                        | 170                   | Solid-state<br>reaction | Ceram. Int. 2020,<br>46, 18106        |
| (Pb <sub>0.965</sub> Sr <sub>0.02</sub> Bi <sub>0.01</sub> )(Zr <sub>0.6</sub> Sn <sub>0.4</sub> )<br>O <sub>3</sub>                                   | 11.28                                                      | 85.54      | 350                                         | 7.6                                         | 350                   | Solid-state<br>reaction | Chem. Eng. J.<br>2022, 434,<br>134660 |



|                                                                                                                                            |       |      |      |      |     |                      |                                       |
|--------------------------------------------------------------------------------------------------------------------------------------------|-------|------|------|------|-----|----------------------|---------------------------------------|
| $(\text{Pb}_{0.97}\text{La}_{0.02})(\text{Zr}_{0.8}\text{Sn}_{0.145}\text{Ti}_{0.055})\text{O}_3$                                          | 4.38  | 70   | ~250 | \    | \   | Solid-state reaction | Ceram. Int. 2017, 43, 11428           |
| $(\text{Pb}_{0.955}\text{La}_{0.03})(\text{Zr}_{0.5}\text{Sn}_{0.43}\text{Ti}_{0.07})\text{O}_3$                                           | 4.2   | 78   | ~200 | \    | \   | Solid-state reaction | Ceram. Int. 2019, 45, 11375           |
| $0.92\text{Pb}(\text{Tm}_{1/2}\text{Nb}_{1/2})\text{O}_3-0.08\text{Pb}(\text{Mg}_{1/3}\text{Nb}_{2/3})\text{O}_3$                          | 3.12  | \    | ~310 | \    | \   | Solid-state reaction | J. Eur. Ceram. Soc. 2017, 37, 3329    |
| $(\text{Pb}_{0.93}\text{Ba}_{0.04}\text{La}_{0.02})(\text{Zr}_{0.65}\text{Sn}_{0.3}\text{Ti}_{0.05})\text{O}_3-0.005\text{Mn}_2\text{O}_3$ | 2.64  | 73   | 308  | \    | \   | Solid-state reaction | J. Am. Ceram. Soc. 2019, 102, 1912    |
| $\text{Pb}_{0.98}\text{La}_{0.02}(\text{Hf}_{0.45}\text{Sn}_{0.55})_{0.995}\text{O}_3$                                                     | 7.63  | 94   | 380  | \    | \   | Rolling process      | J. Mater. Chem. C 2020, 8, 17016      |
| $\text{Pb}_{0.94}\text{La}_{0.02}\text{Sr}_{0.04}(\text{Zr}_{0.9}\text{Sn}_{0.1})_{0.995}\text{O}_3$                                       | 11.18 | 82.2 | 395  | 8.6  | 400 | Tape-casting         | J. Mater. Chem. A 2019, 7, 11858      |
| $\text{Pb}_{0.95}\text{Ca}_{0.02}\text{La}_{0.02}(\text{Zr}_{0.93}\text{Sn}_{0.05}\text{Ti}_{0.02})\text{O}_3$                             | 14.5  | 77.1 | 448  | 11.6 | 448 | Tape-casting         | J. Eur. Ceram. Soc. 2021, 41, 4138    |
| $(\text{Pb}_{0.96}\text{La}_{0.04})(\text{Zr}_{0.99}\text{Ti}_{0.01})\text{O}_3$                                                           | 11.38 | 79.2 | 395  | 6.2  | 350 | Tape-casting         | ACS Appl. Energy Mater. 2021, 4, 4897 |

|                                                                                                |      |      |     |       |     |              |                                  |
|------------------------------------------------------------------------------------------------|------|------|-----|-------|-----|--------------|----------------------------------|
| $(\text{Pb}_{0.94}\text{Sm}_{0.04})(\text{Zr}_{0.6}\text{Sn}_{0.4})\text{O}_3$                 | 11.2 | 85.1 | 400 | 9.7   | 410 | Tape-casting | Chem. Eng. J. 2022, 447, 137367  |
| $(\text{Pb}_{0.88}\text{Cd}_{0.03}\text{La}_{0.06})(\text{Zr}_{0.6}\text{Sn}_{0.4})\text{O}_3$ | 19.3 | 91   | 870 | 15.35 | 780 | Tape-casting | Adv. Mater. 2022, 34, 2201333    |
| $\text{Pb}_{0.98}\text{La}_{0.02}(\text{Zr}_{0.7}\text{Sn}_{0.3})_{0.995}\text{O}_3$           | 12.6 | 80   | 560 | 3.7   | 300 | MLCC         | Inorg. Chem. Front. 2020, 7, 756 |
